# Supplementary material for: Decoding the Volatile Profile of White Romanian Fetească Wines
Source: MDPI journal article supplement (doi:10.3390/separations11050141), 2024-05-03
Supplement: s1 [file s1]

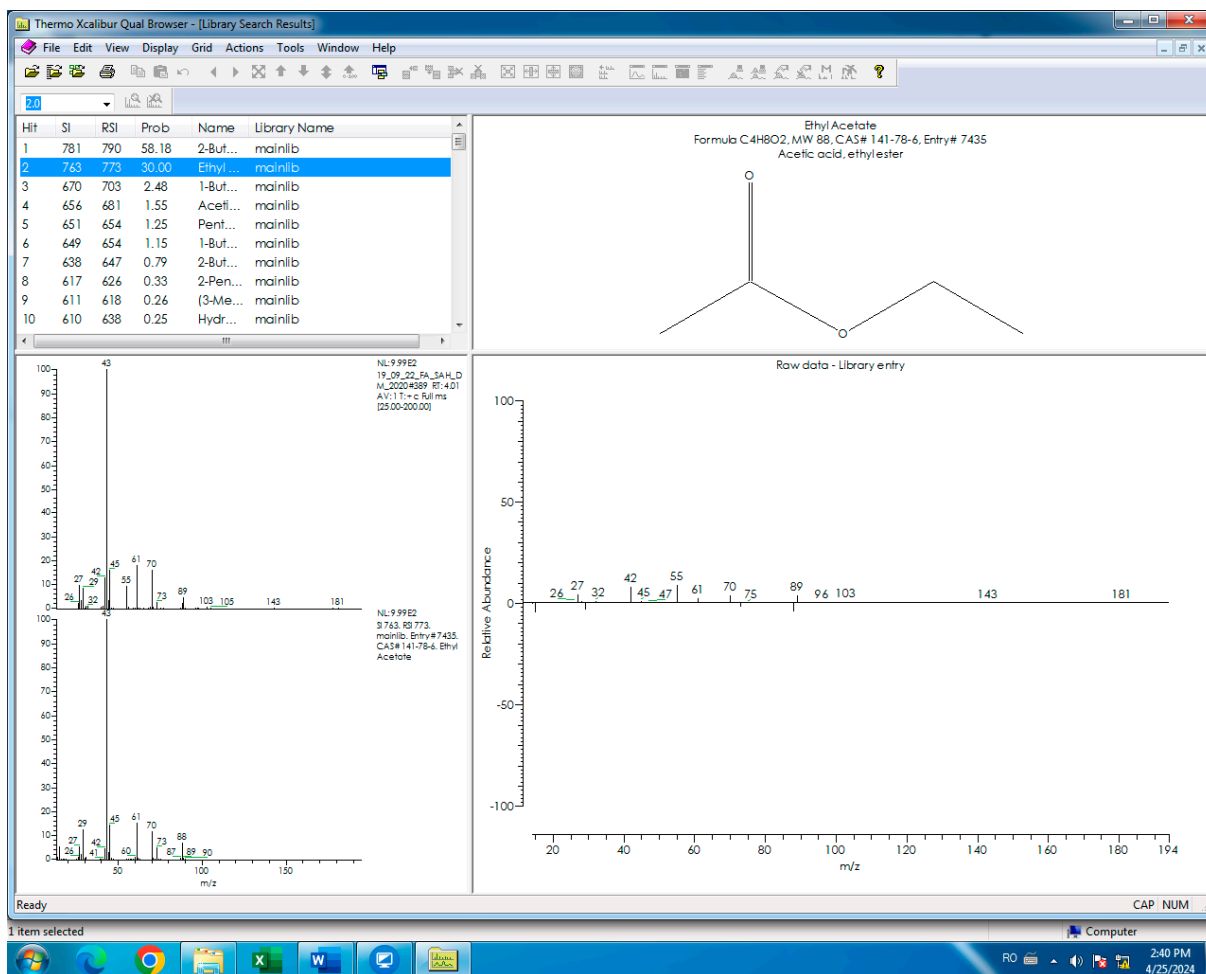

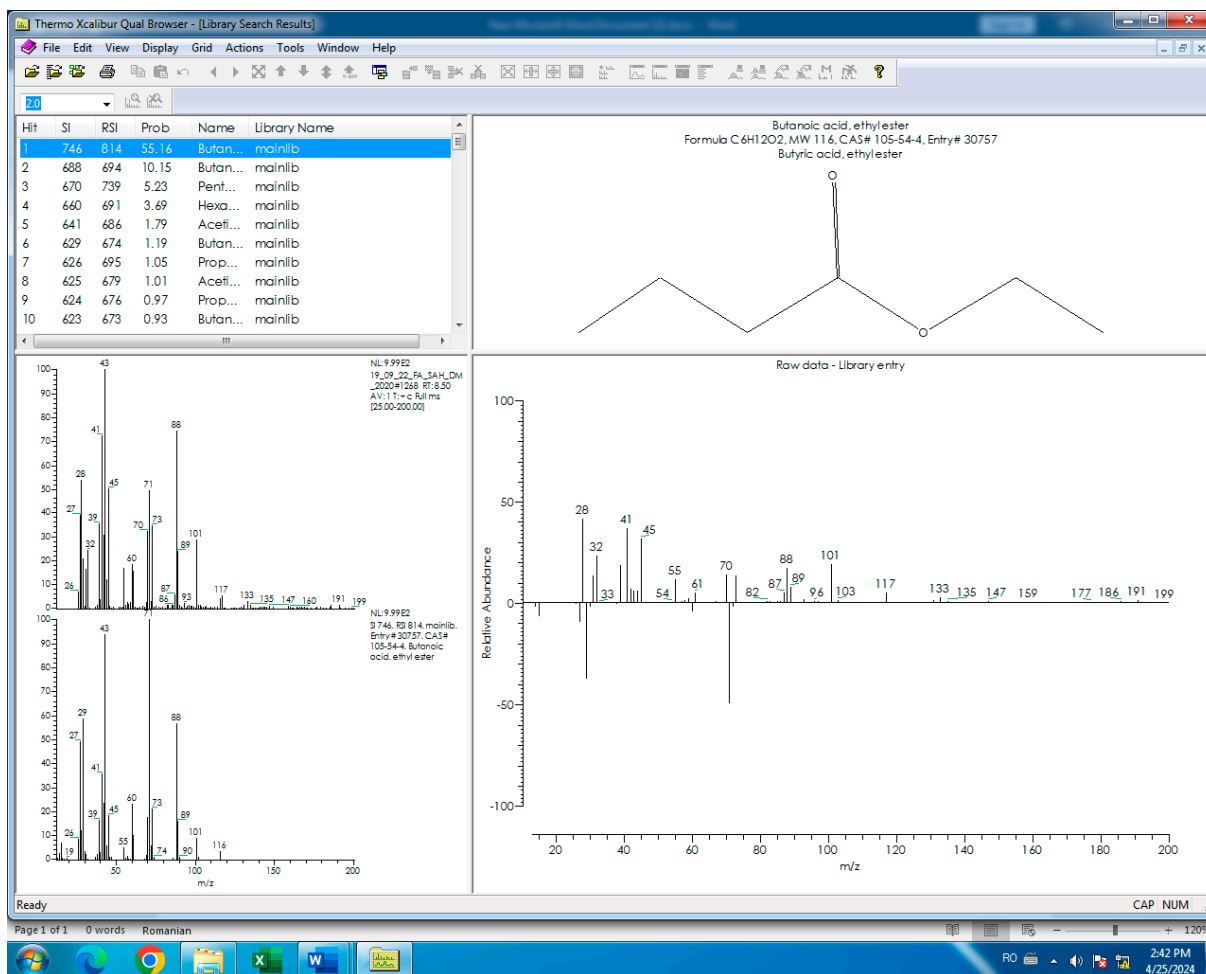

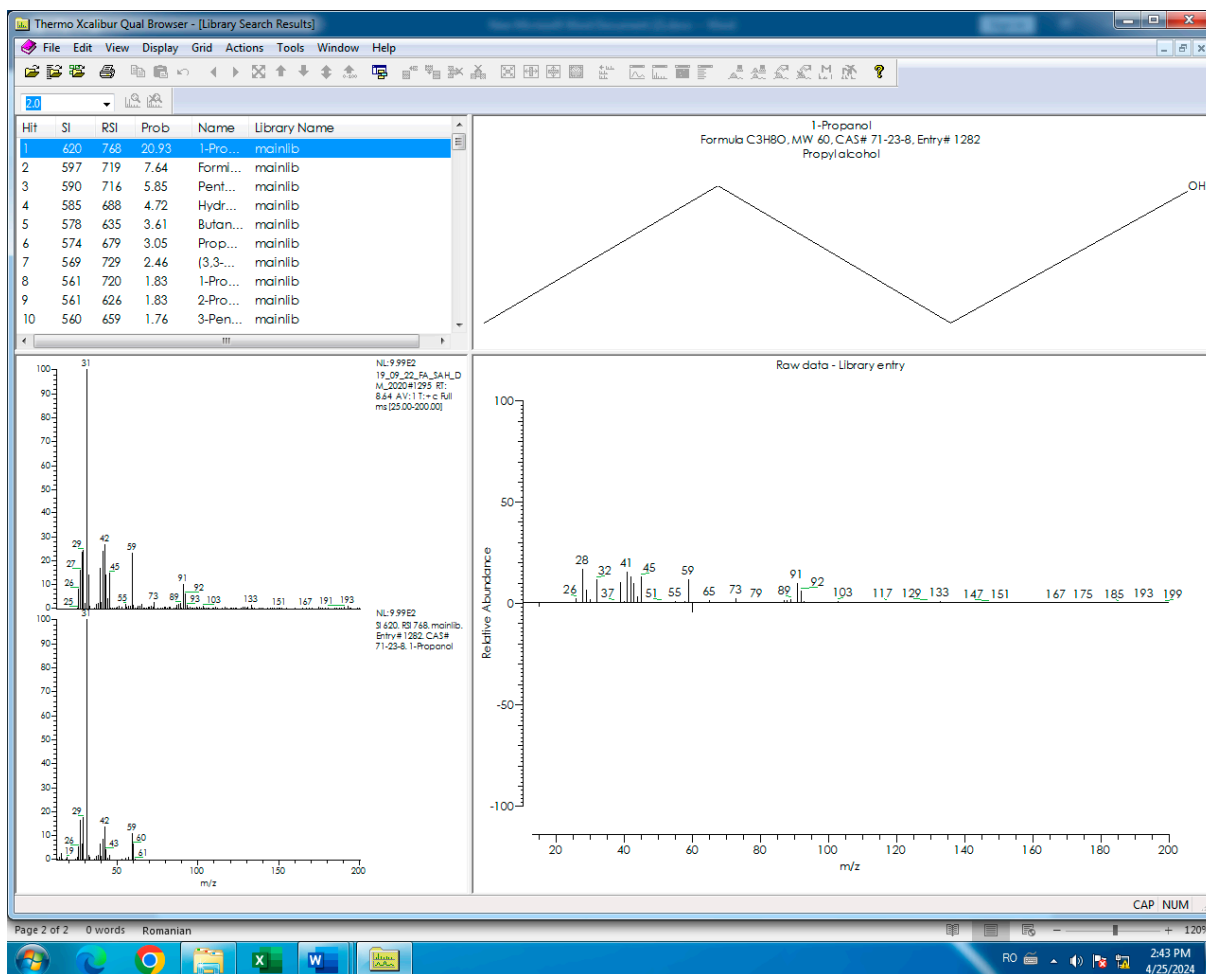

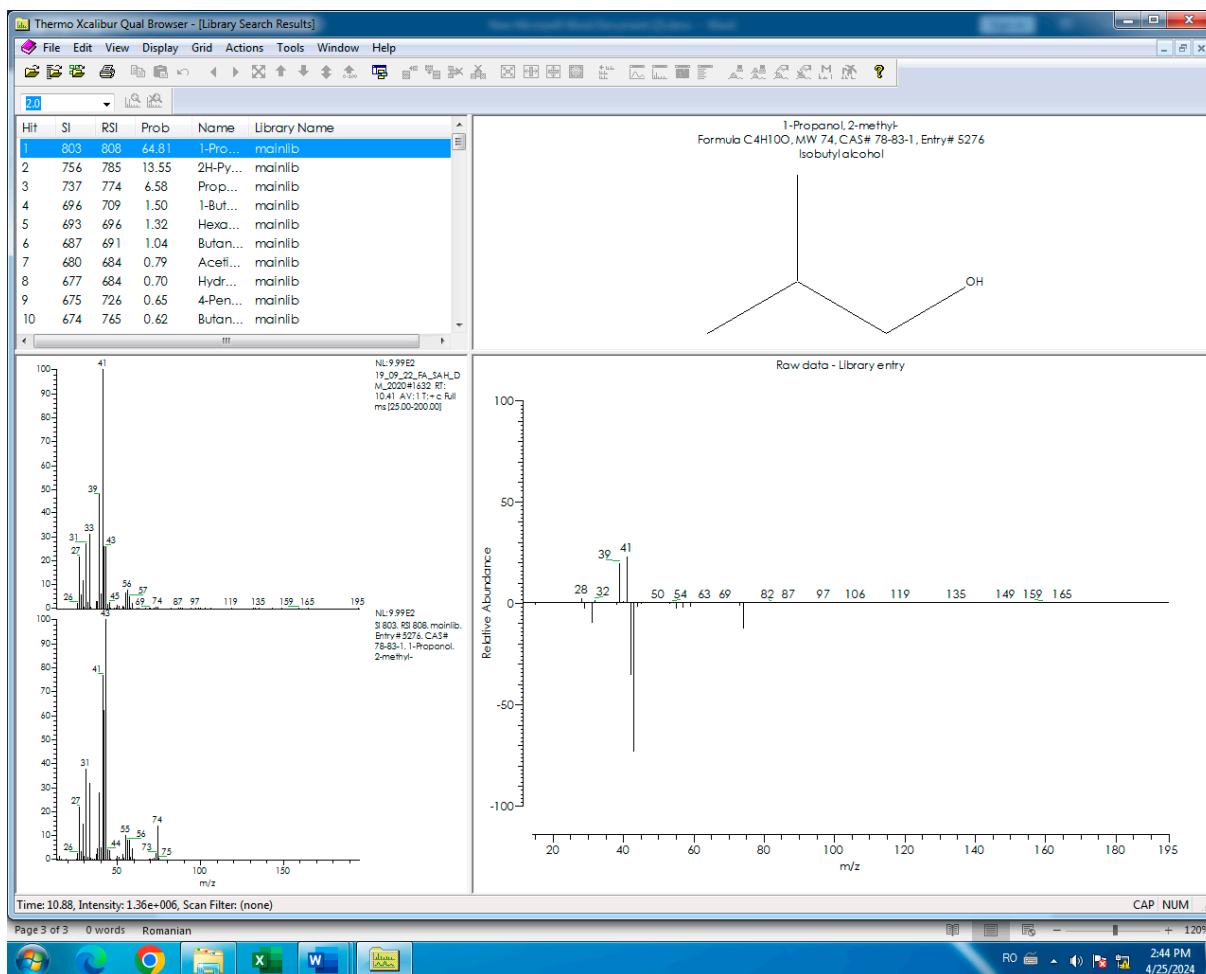

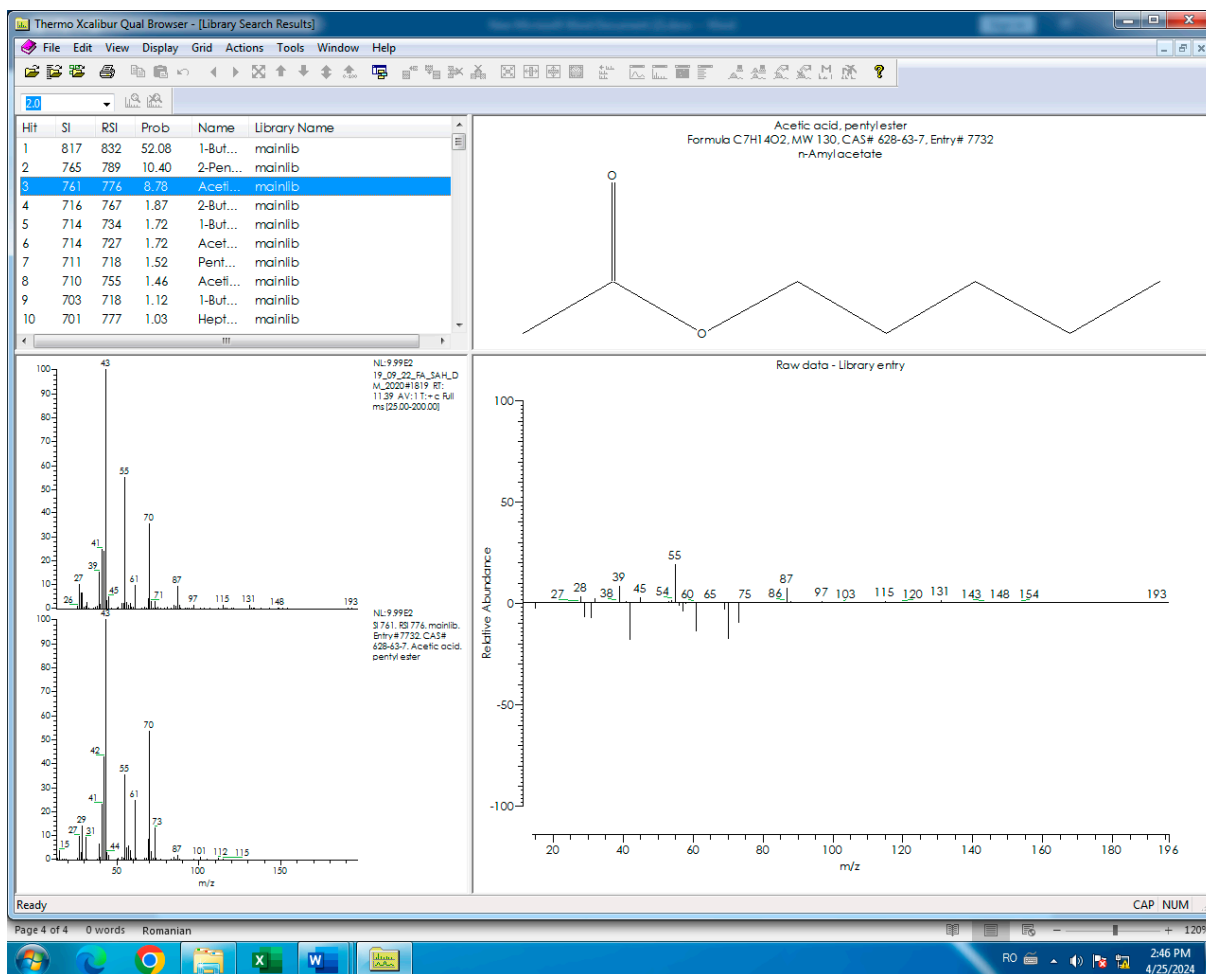

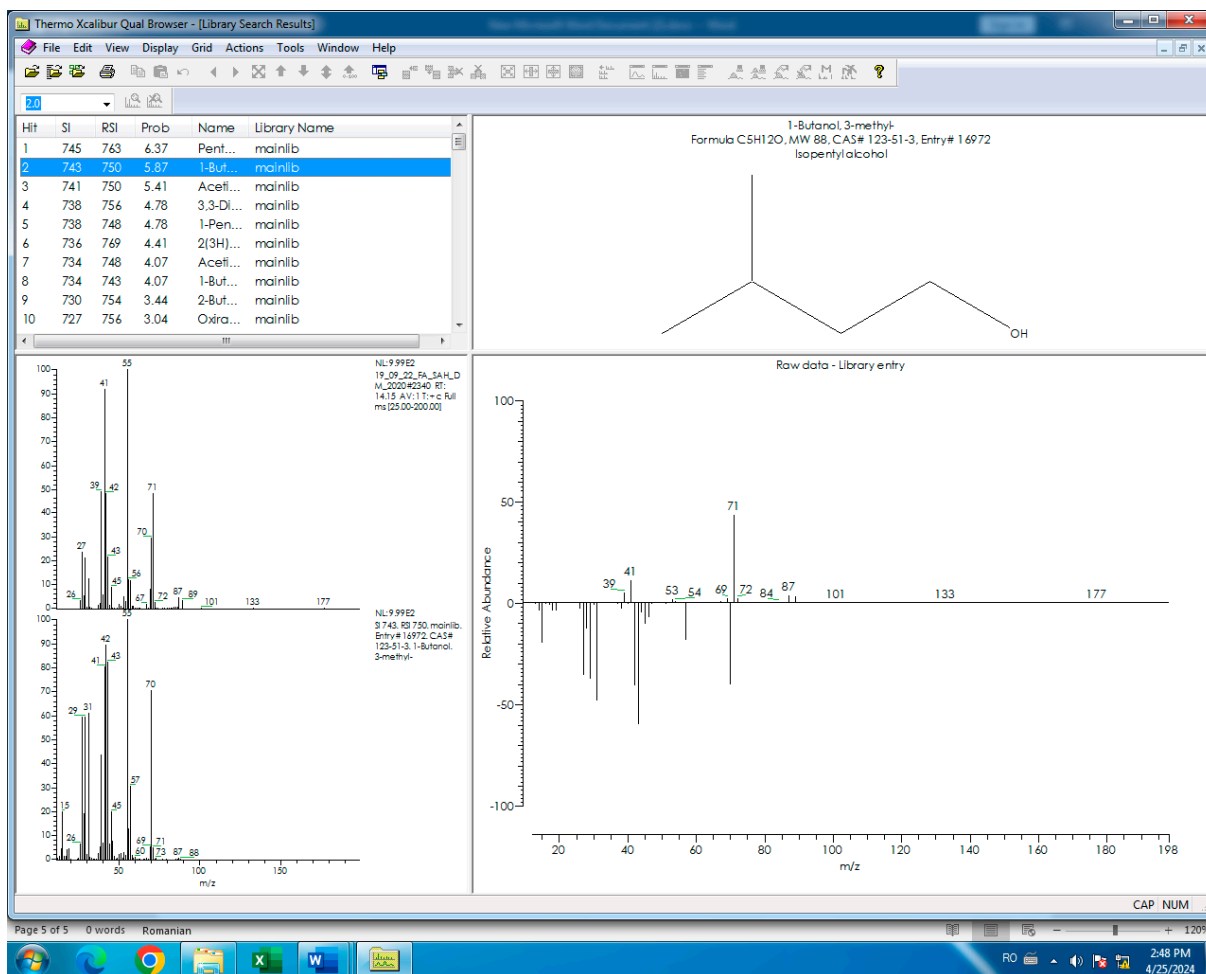

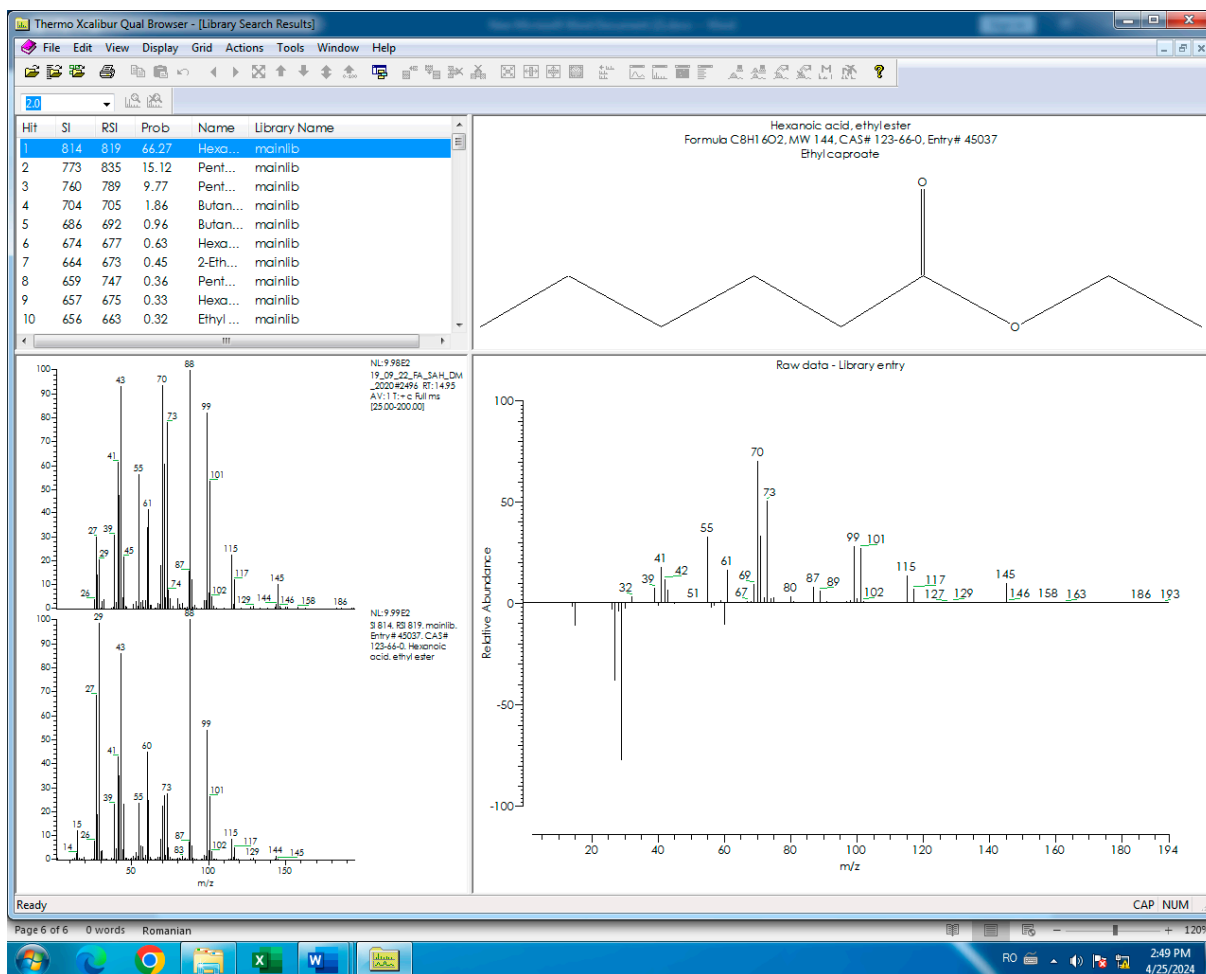

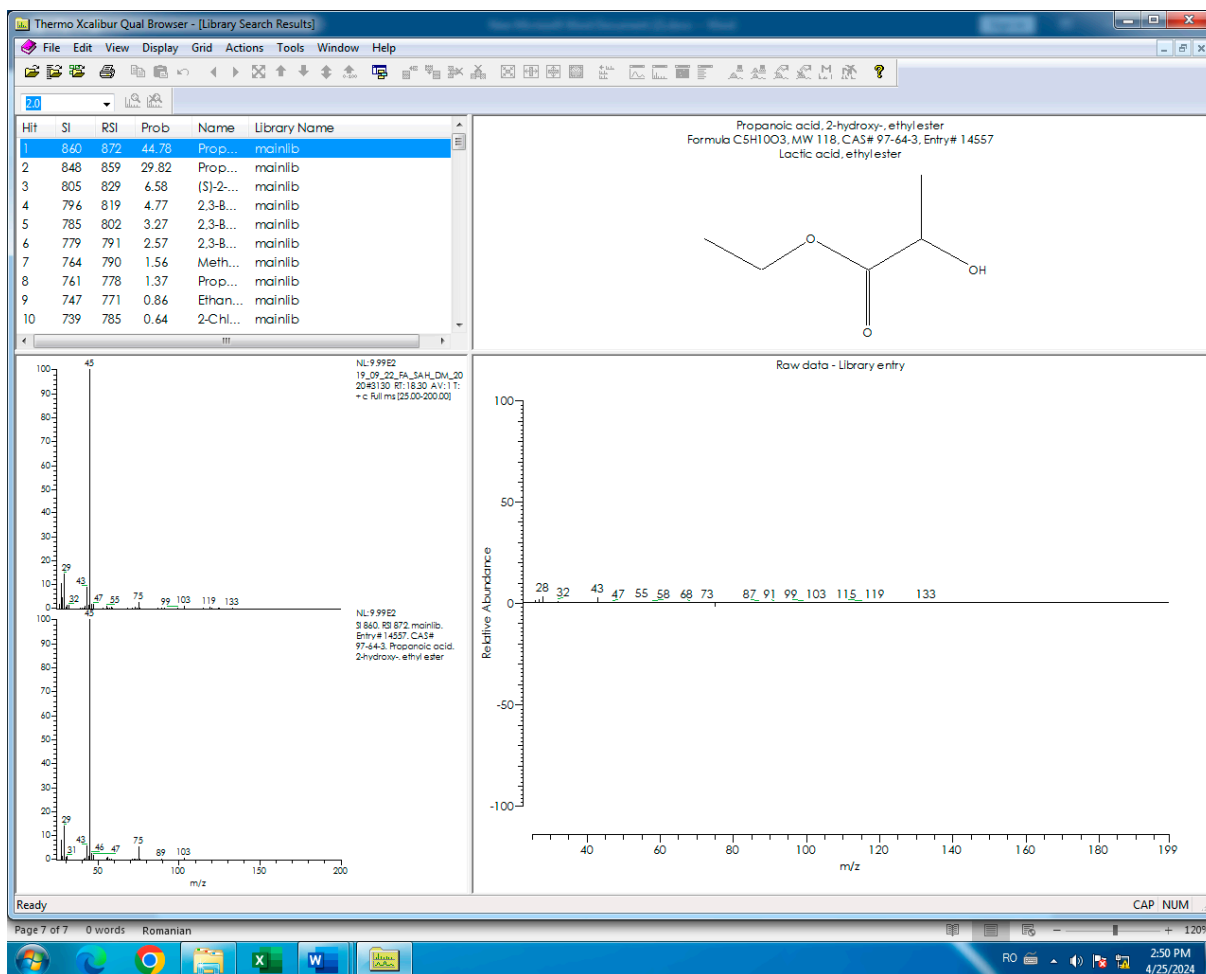



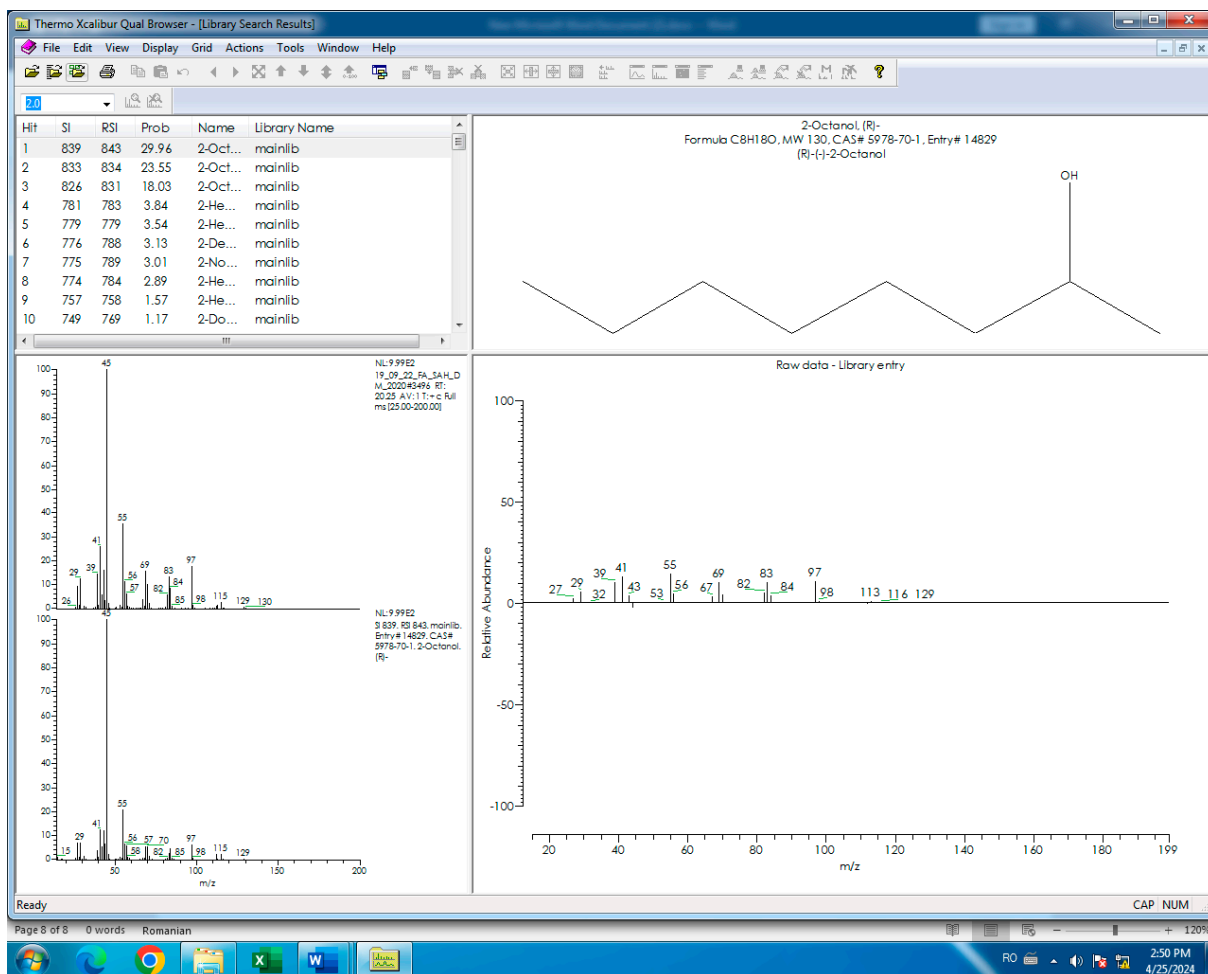

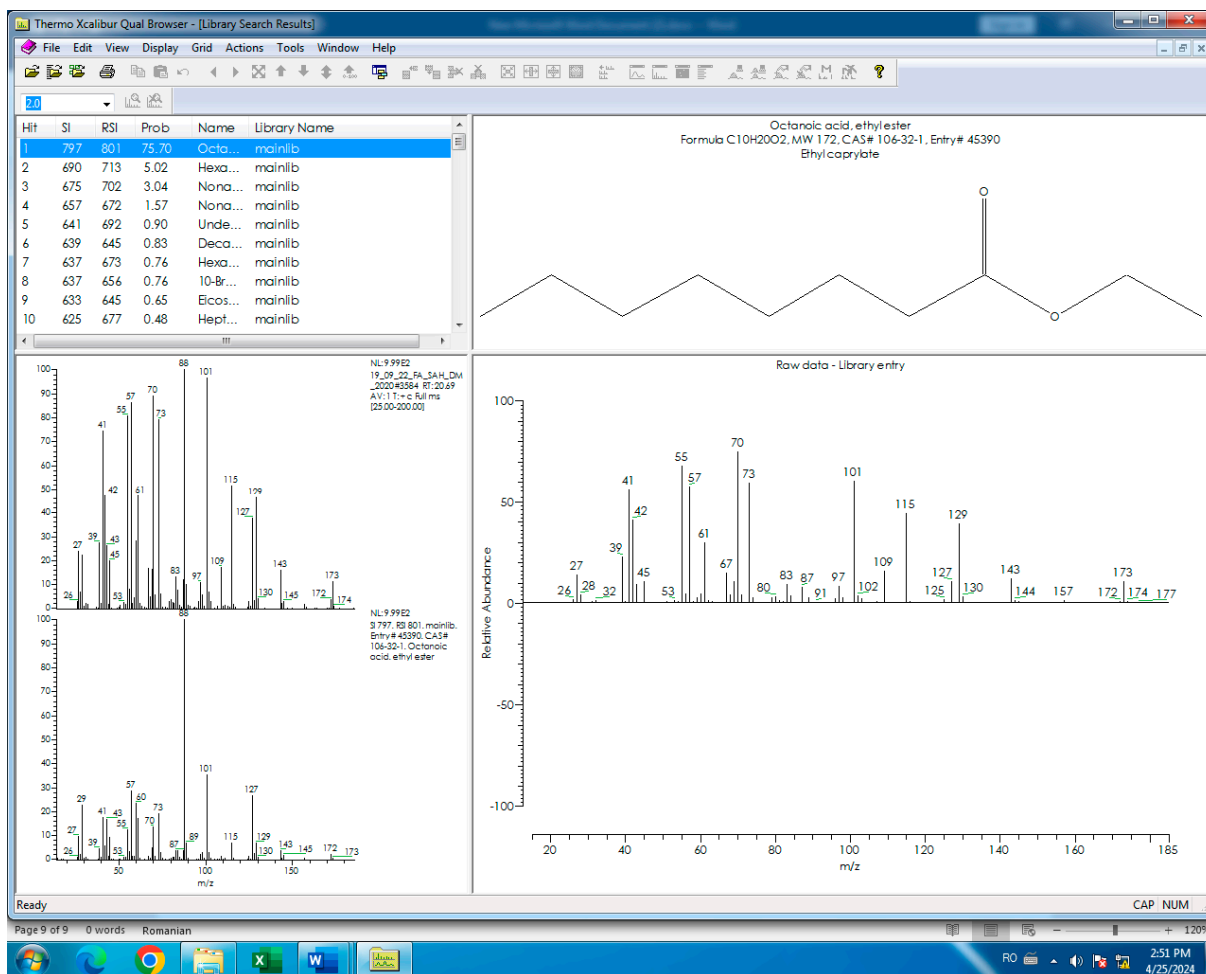

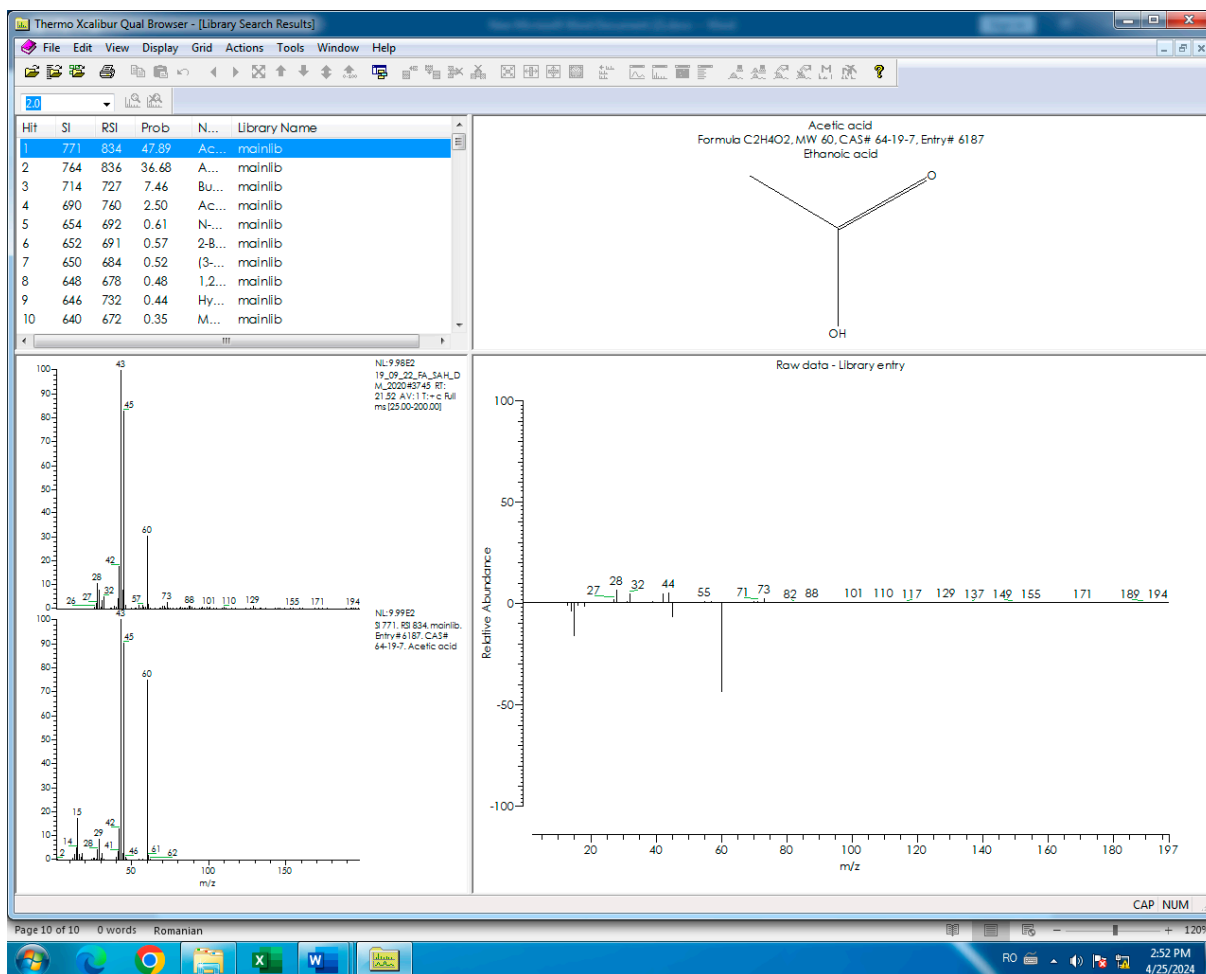

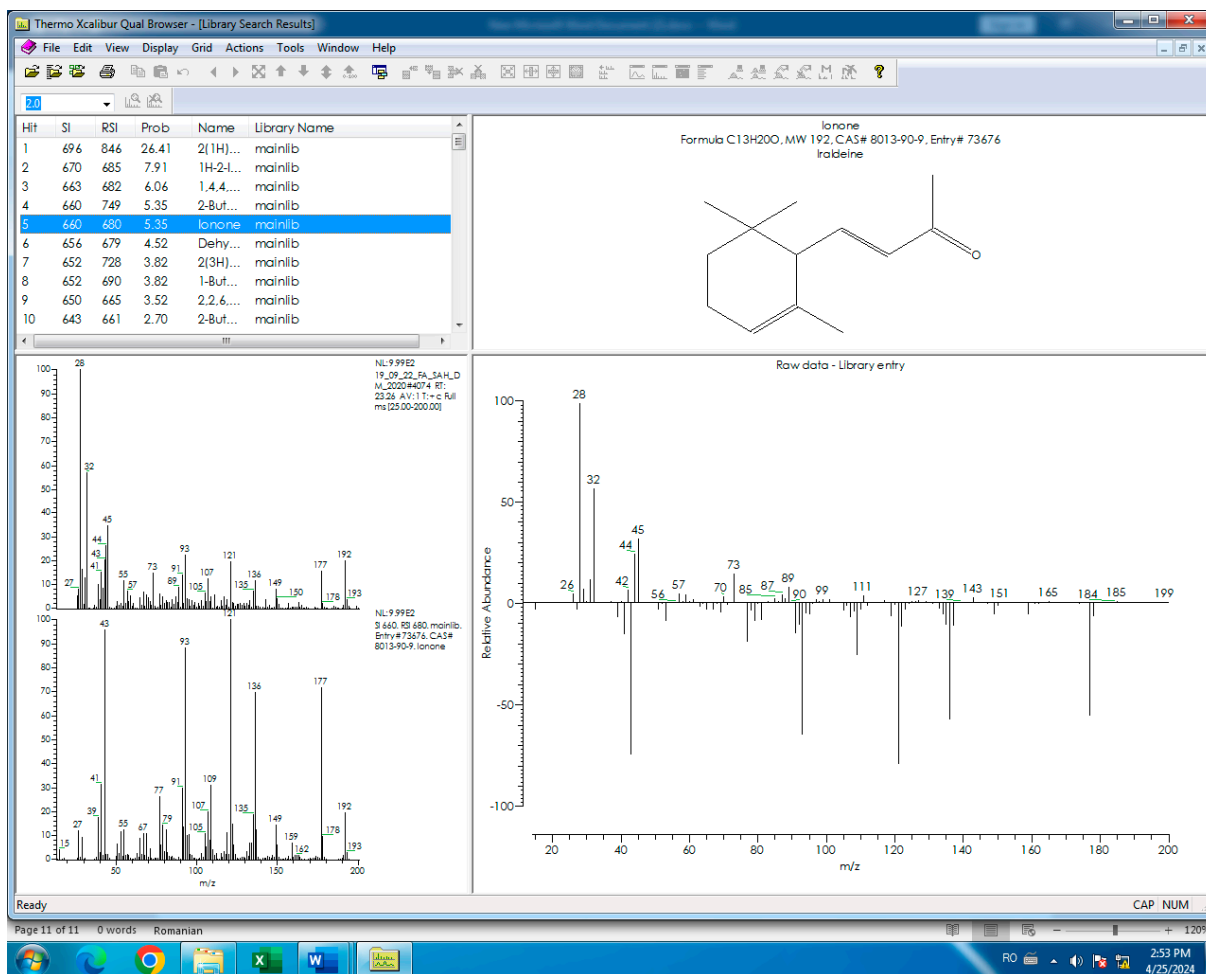

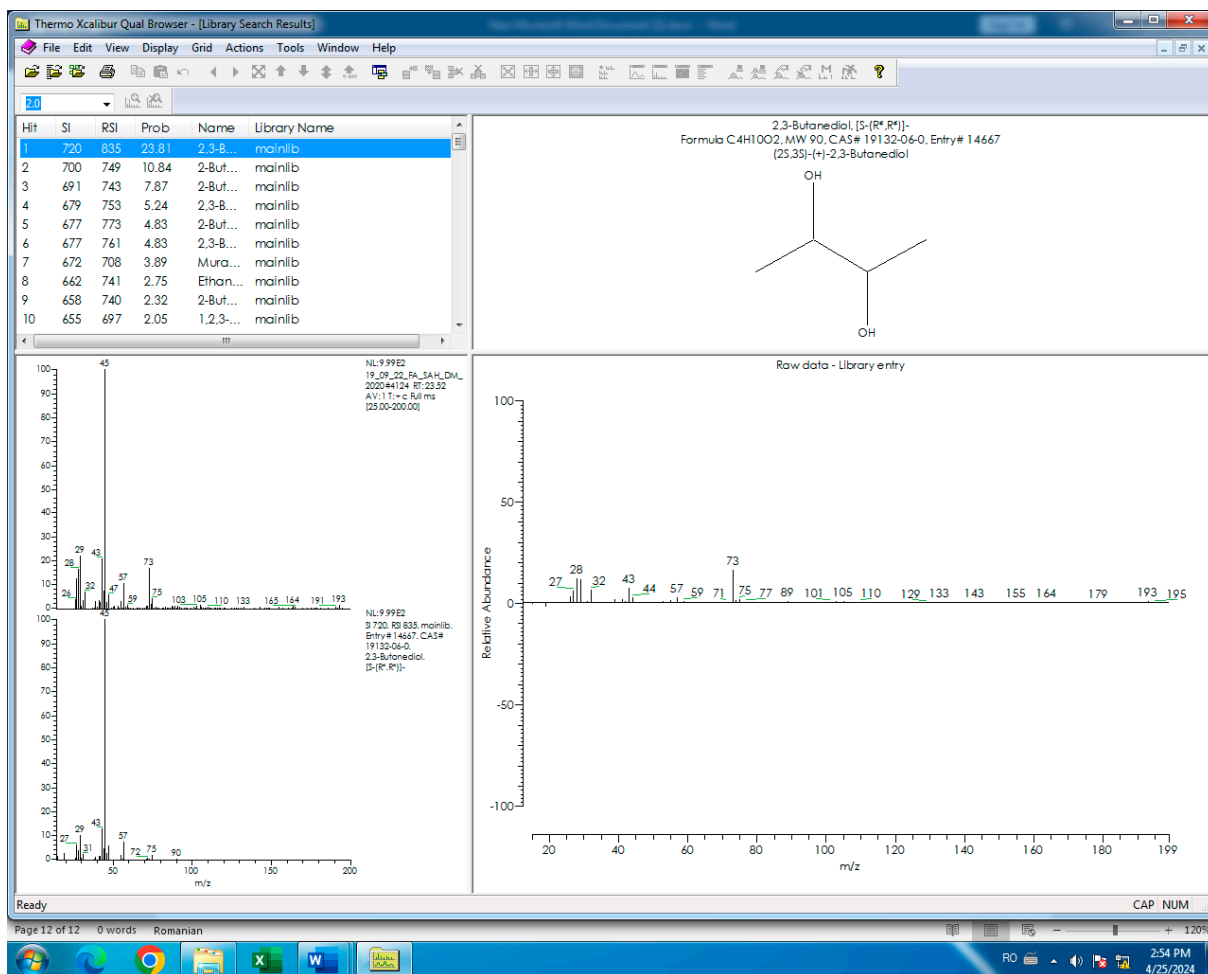

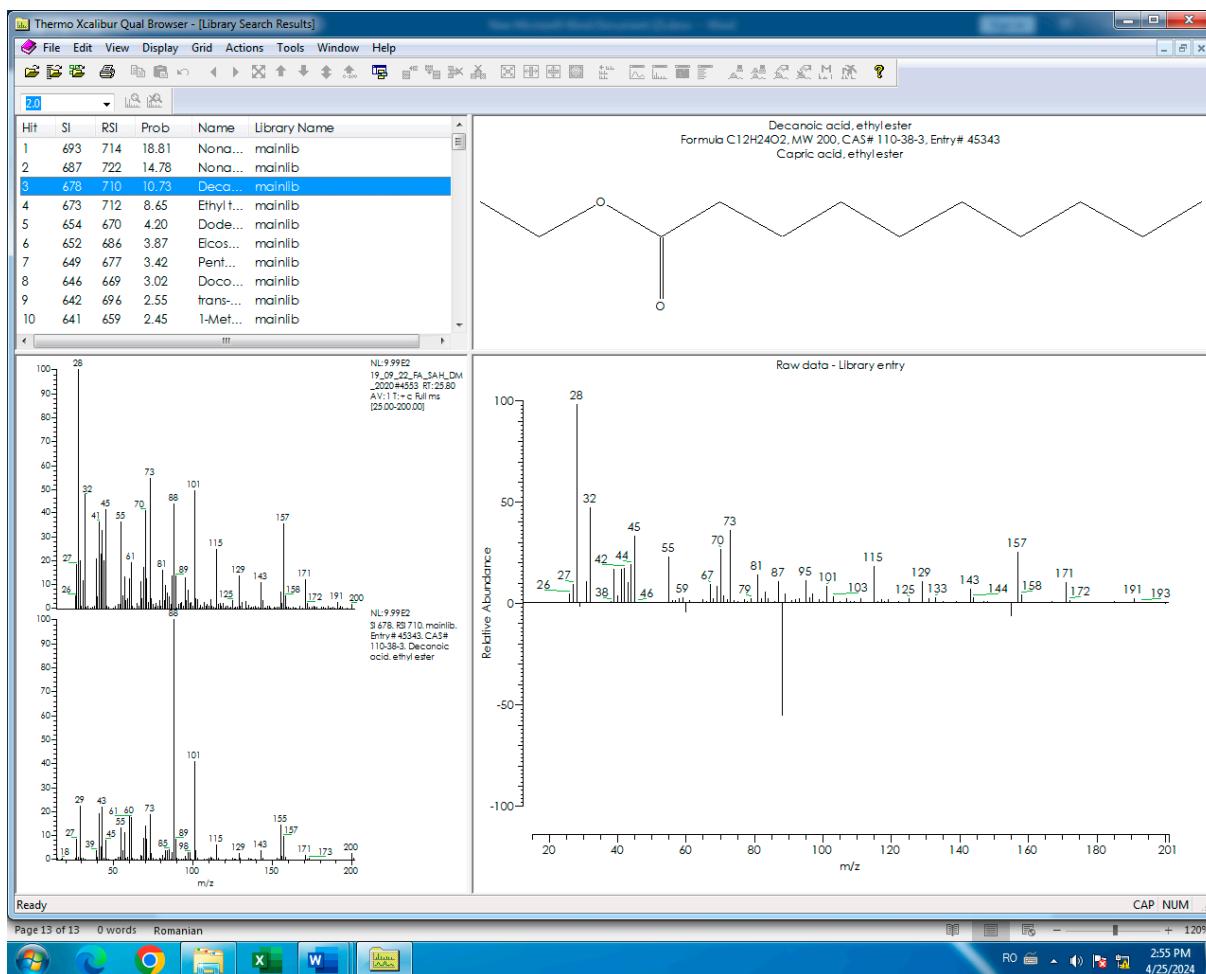

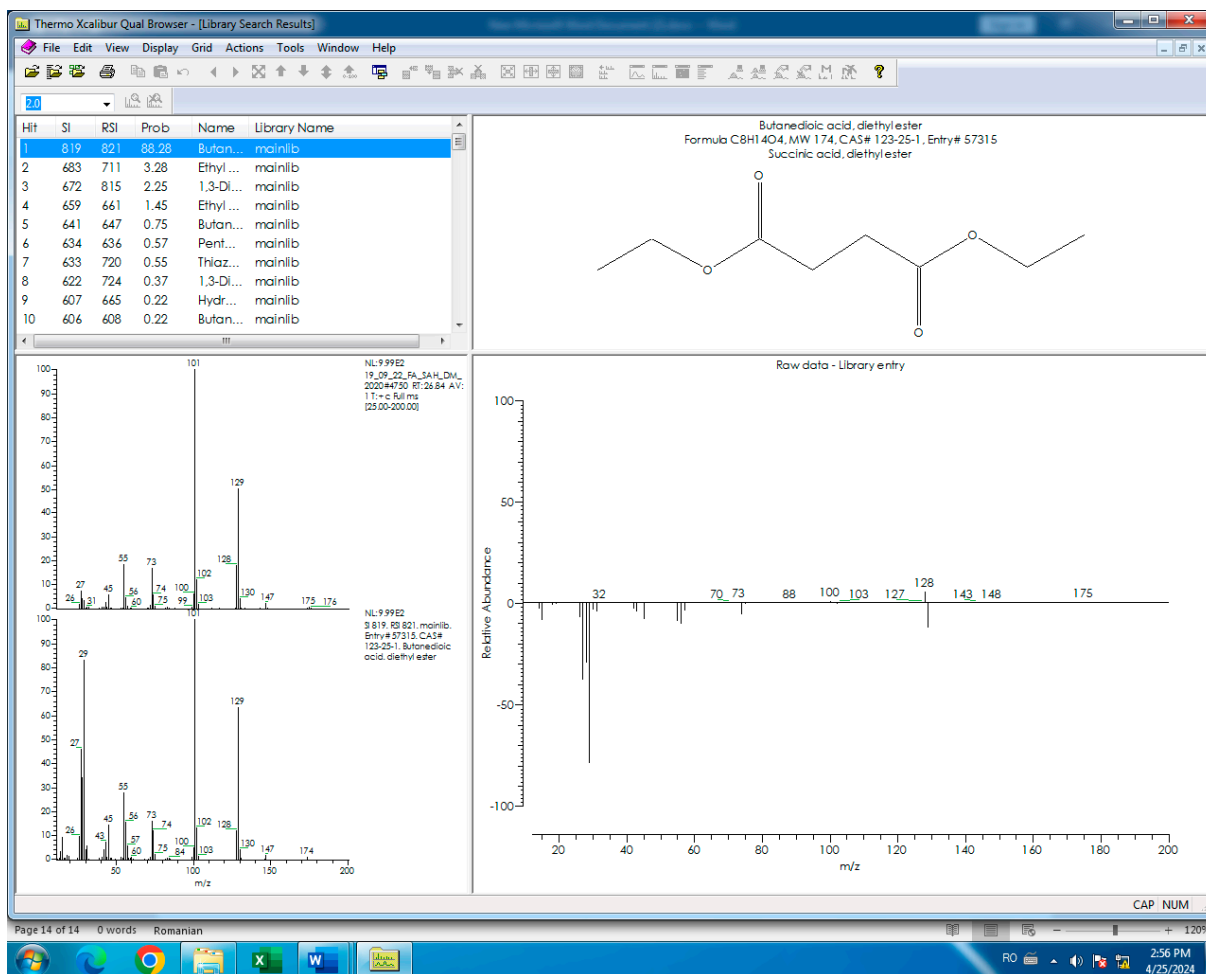

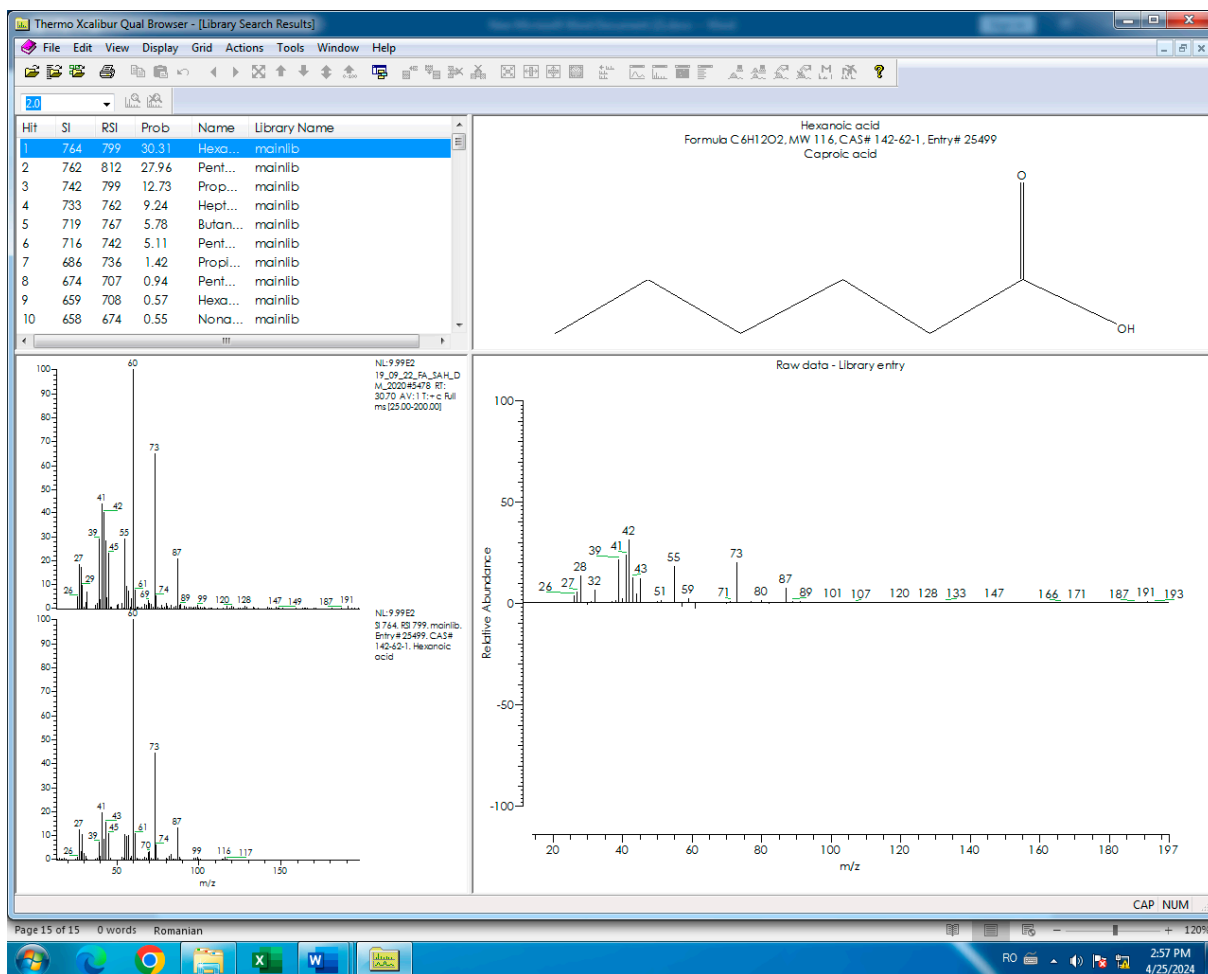



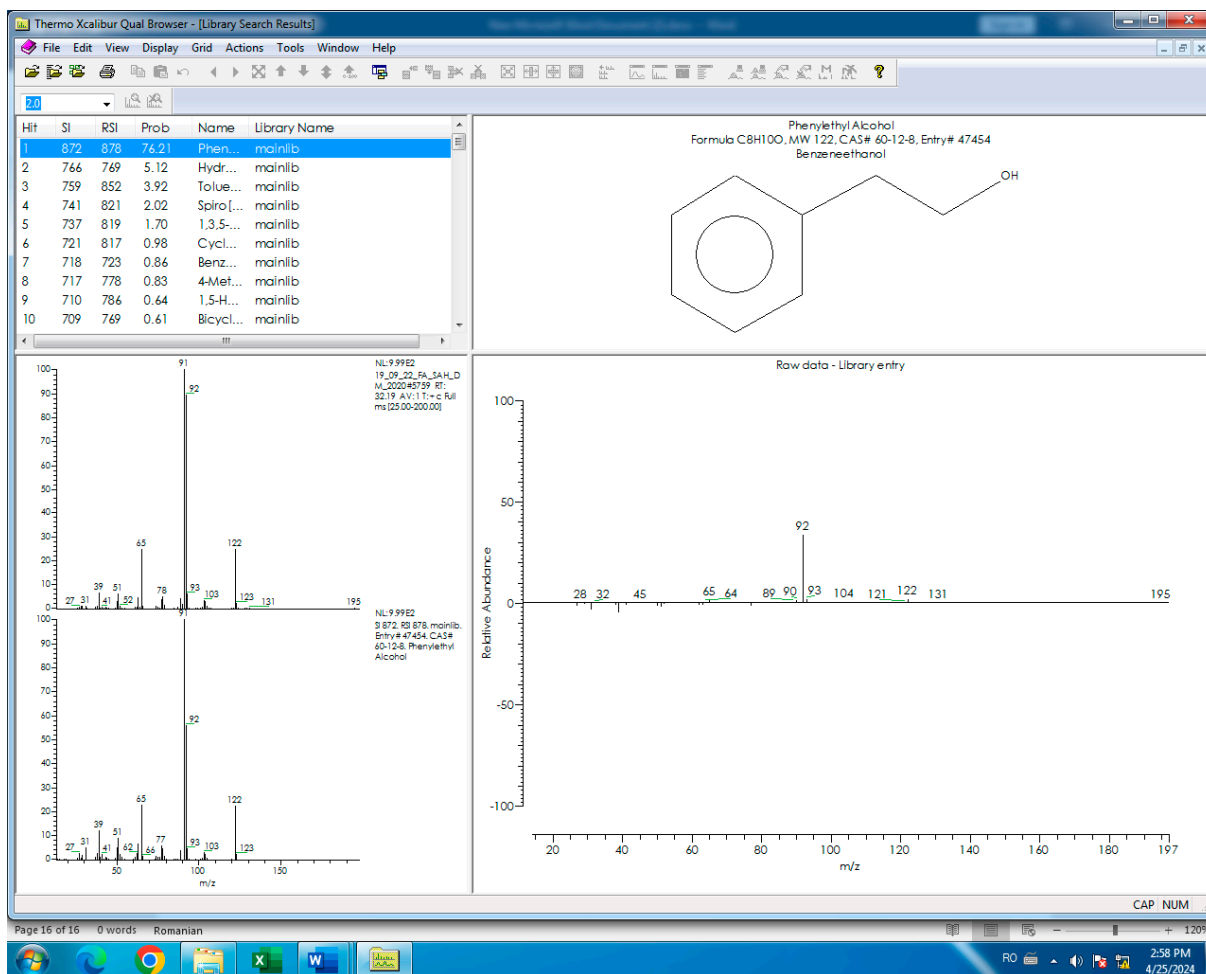

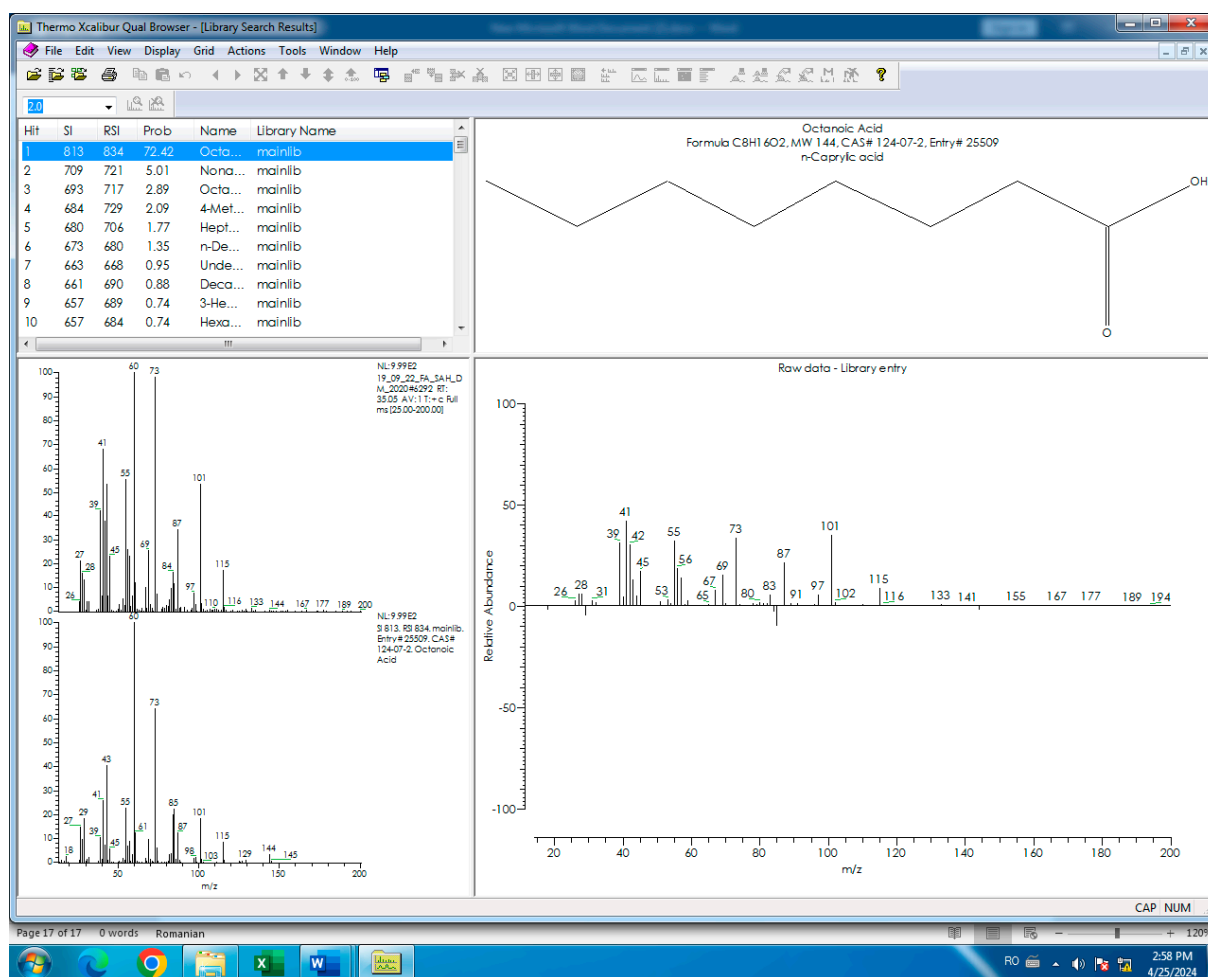

Figure S1: Spectrum of volatile organic compounds detected via GC-MS analysis, matching with NIST library
